# Supplementary material for: Assessing Upper Limb Function in Breast Cancer Survivors Using Wearable Sensors and Machine Learning in a Free-Living Environment
Source: MDPI journal article supplement (doi:10.3390/s23136100), 2023-07-02

*Supplementary material 1: Figure representing raw acceleration signal ( $\text{m/s}^2$ ) and the manual video annotation with the functional, non-functional and unknown label.*

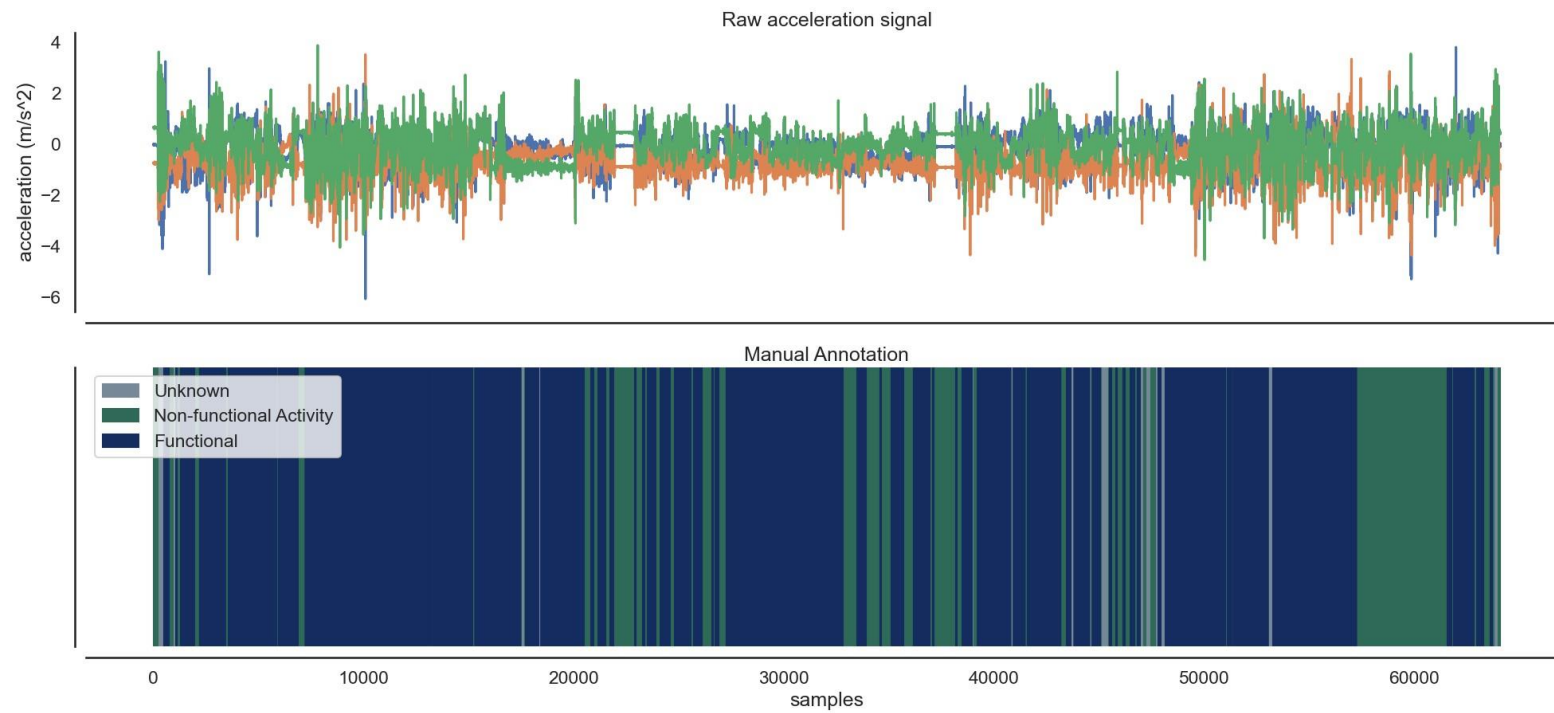

Supplement: s1 [file s1]
